# Supplementary material for: Strawberry cultivar identification based on hypervariable SSR markers
Source: PubMed Central journal article supplement — Breed Sci. 2011 Dec 15;61(4):420–5. doi: 10.1270/jsbbs.61.420 (PMC3406763; doi:10.1270/jsbbs.61.420), 2011-12-15
Supplement: 61-4-420suppl.pdf [file 61-4-420suppl.pdf]

**Supplemental Table 1.** SSR genotypes of 75 strawberry accessions obtained in this study

| Accession name       | SSR genotype <sup>a</sup>       |                             |                                             |                                 |
|----------------------|---------------------------------|-----------------------------|---------------------------------------------|---------------------------------|
|                      | FxaHGA02P13                     | FxaAGA21F11                 | EMFv104                                     | EMFvi136                        |
| Aiko                 | 262 265 276 284 294 302         | 146 150 169 170             | 118 125 131 133 136 152                     | 149 163 167 179 182 183         |
| Akihime              | 244 256 260 265 268 270 286     | 150 158 166                 | 102 114 129 131 136 138 148 152 154         | 149 161 169 181 189 191         |
| Akitaberry           | 244 256 262 265 276 282 294 302 | 134 150 152 158 166 170     | 102 122 131 133 136 138 146 148 154         | 149 163 169 179 189 191         |
| Amaotome             | 244 260 265 268 276             | 150 152 158 162 166         | 102 118 129 134 136 142 152                 | 149 161 169 181 182 189         |
| Benihoppe            | 244 265 268 270 276 282 286     | 150 158 166                 | 102 114 129 133 134 136 138 148 152         | 149 161 169 179 181 189         |
| Beruruju             | 244 265 282 290 294 302         | 134 150 152 160 166         | 102 122 131 133 136 138 148 154             | 149 155 169 179 189 191         |
| Blakemore            | 260 262 265 268 270 290         | 150 152 170                 | 118 129 130 131 133 136 138 140 146         | 140 161 163 169 179 183 191     |
| Bolero               | 260 262 265 268 290 294         | 146 148 150 152 156 170     | 102 118 125 129 130 136 140 152             | 149 181 189                     |
| Cambridge Favourite  | 256 262 265 268 270 272 276 290 | 150 152 158 164 175 180     | 102 110 118 129 130 133 138 140 146 148 154 | 140 155 161 169 182 183 191     |
| Cardinal             | 262 265 266 268 290 302         | 146 148 150 160 170         | 102 118 122 129 131 133 136 138 146 152 154 | 149 161 169 181 191             |
| Dekoruju             | 272 276 284 294                 | 146 150 152 158 169         | 102 114 125 131 133 136 138 146 148 154     | 161 179 181 183 189             |
| Deutch Evern         | 244 256 260 266 270 276 286     | 152 164 166 170             | 102 112 114 129 133 136 138 146 150 158 166 | 155 161 179 182 189 195         |
| Donner               | 244 260 262 265 268 276 294     | 150 152 158 164 166         | 102 118 122 130 133 136 138 148 152 154     | 149 161 169 179 181 182 189     |
| Elsanta              | 244 260 262 265 266 272 294     | 146 148 150 152             | 102 118 129 130 133 138 146 148             | 161 179 183 189                 |
| Everberry            | 256 262 265 268 286 302         | 146 150 152 164 166 175     | 102 114 122 129 131 133 136 140 152 154 156 | 149 169 181 182 185 189         |
| Florence             | 244 265 268 276                 | 134 146 148 150 152 170     | 102 118 129 130 133 136 138 146 152         | 155 161 169 181 183 185         |
| Fukuba               | 256 260 268 270 273 284 286     | 146 162 166 180             | 102 114 129 130 133 134 136 138 150         | 158 183 189                     |
| Harumi               | 244 260 265 268 282 284 302     | 146 150 152 169             | 102 118 122 133 138 146 148                 | 149 155 179 183 191             |
| Haruyoi              | 256 262 268 270 282 286 302     | 146 150 152 162 166         | 102 114 122 129 133 136 152 154             | 149 161 169 181 183 189 191     |
| Hatsukuni            | 244 256 260 262 268 270 302     | 146 150 162 175             | 102 114 118 133 134 136 138 148 150         | 149 161 169 183 189             |
| Hecker               | 260 262 268 290                 | 146 150 152 169 170         | 118 122 125 130 131 133 136 138 148 152 154 | 145 149 181 183 189             |
| Hitachihime          | 244 256 268 270 286             | 150 152 158 166             | 102 114 118 129 133 136 152 154             | 161 169 181 189                 |
| Hogyoku              | 244 256 260 268 270 273 286 302 | 146 150 162 166 175         | 102 118 129 131 133 134 136 138 146 150     | 149 155 183 189                 |
| Hokowase             | 244 256 260 262 268 282 302     | 146 150 152 175             | 102 114 118 131 133 136 138 148 152 154     | 155 161 169 179 182 183 189 191 |
| HS 138               | 256 260 262 268 286 294 302     | 146 150 152 166 170         | 118 122 129 131 136 138 140 146 156         | 149 179 181 182 189 191         |
| Ibarakiss            | 244 256 265 268 270 276         | 150 152 158 162 166         | 102 129 133 134 136 152 154                 | 149 161 169 181 182 189 191     |
| Kaorino              | 260 265 270 284 286             | 146 162 166                 | 118 131 133 136 152                         | 161 169 181 189                 |
| Karenberry           | 262 265 268 272 276 284         | 146 150 152 166             | 102 114 118 129 133 136 138 146 152         | 149 155 181 182 183 185 189     |
| Kitaekubo            | 256 262 265 270 272 282 294     | 146 150 152 156 160 170 175 | 102 114 118 129 131 133 136 138 140 148 154 | 155 158 179 181 189 191         |
| Kitanokagayaki       | 244 265 268 272 282 302         | 134 146 150 152 166 169     | 102 118 122 131 133 136 138 148 152 154     | 149 155 169 179 189 191         |
| Komachiberry         | 244 260 265 268 282 284 290     | 146 150 152 160             | 102 114 122 131 133 136 138 146 148 154     | 149 161 169 179 189 191         |
| Mae                  | 244 260 262 265 266 294 302     | 146 148 150 156 164 170     | 118 122 129 130 131 136 138 142 148 152     | 161 167 179 181 185             |
| Marshall             | 244 262 268 272 276 290         | 146 148 150 158 164 175     | 102 116 118 125 133 134 138 146 148         | 149 155 181 182 187 189         |
| Miyazaki-natsuharuka | 244 260 265 268 282 302         | 146 150 152 166 175         | 114 129 131 136 152 154                     | 149 161 169 181 182 189         |
| Miyoshi              | 244 262 265 282 292 302         | 146 150 164 166 175         | 114 129 131 133 136 140 152 156             | 149 169 181 183 189             |
| Moikko               | 244 260 265 276 282 302         | 150 152 158 162 166         | 102 118 129 130 133 134 136 138 152         | 149 161 181 182 189 191         |
| Morioka16            | 244 256 262 265 276 282 294 302 | 134 150 152 158 166 170     | 102 122 131 133 136 138 146 148 154         | 149 163 169 179 189 191         |
| Morioka30            | 244 274 284 290 294             | 150 152 164 170             | 102 118 122 133 136 138 148 152 154         | 149 155 169 179 181 183 189     |
| Morioka32            | 244 265 274 282 284 294         | 134 146 152 164 166         | 102 118 131 133 136 152 154                 | 149 155 169 179 183 187 189     |

**Supplemental Table 1.** (continued)

| Accession name          | SSR genotype <sup>a</sup>       |                         |                                                 |                                 |
|-------------------------|---------------------------------|-------------------------|-------------------------------------------------|---------------------------------|
|                         | FxaHGA02P13                     | FxaAGA21F11             | EMFv104                                         | EMFvi136                        |
| Morioka33               | 244 260 265 268 276 282         | 134 146 150 152 175     | 102 114 118 133 134 136 138 146 152             | 149 161 169 179 189             |
| Morioka34               | 262 265 272 276 284 294         | 134 146 148 150 175     | 102 114 118 131 133 136 152                     | 149 161 169 181 189             |
| Morioka35               | 262 265 268 272 276 282 284     | 146 150 152 164         | 102 114 118 133 136 152 154                     | 149 155 169 179 181 182 183 189 |
| Natsuakari              | 244 262 265 282 302             | 134 146 150 152 166 175 | 102 114 122 125 131 133 134 136 138 148 152 154 | 149 161 169 179 189             |
| Nohime                  | 244 256 265 268 276             | 150 158 162 166         | 102 118 129 130 133 134 136 138 152             | 149 161 169 179 181 182 189     |
| Nyoho                   | 244 256 260 265 268 270 276     | 150 152 158 162 166     | 102 118 129 133 134 136 152                     | 149 169 181 182 189 191         |
| Ohishi-shikinari        | 256 262 265 268 292 302         | 146 150 164 175         | 114 118 129 131 133 136 140 150 156             | 149 155 167 169 181 182 185 189 |
| Otomegokoro             | 244 265 268 276 294 302         | 134 146 164 166         | 102 118 122 129 131 136 138 148 152 154         | 155 161 169 179 182 189         |
| Oze-akaran              | 244 265 268 270 276 302         | 146 150 152 162 166 169 | 102 118 133 136 152                             | 149 179 181 182 189             |
| Pajaro                  | 244 260 265 268 272 284 294     | 146 150 152 169         | 102 114 118 131 133 136 138 146 152 154         | 149 161 179 181 183 189         |
| Pechka                  | 244 265 276 282 302             | 134 146 150 152 175     | 114 131 133 136 152                             | 161 169 179 181 189             |
| Pegasus                 | 262 265 272 278 294 302         | 134 146 148 156 160 170 | 98 102 122 129 131 133 136 138 148 150          | 155 161 169 179 185             |
| Pelican                 | 244 262 265 266 268 276 290     | 146 148 150 170         | 118 122 129 131 133 136 140 152 156             | 149 161 169 179 182 183 187 189 |
| Raiho                   | 244 256 260 265 268 276         | 152 162 164 166 170     | 102 118 122 125 131 133 136 152                 | 149 181 182 189                 |
| Red Gauntlet            | 262 265 266 272 278 302         | 146 152 160 164 170     | 98 122 131 133 136 138 146 150                  | 149 155 169 179 181 183 185     |
| Reiko                   | 244 260 265 270 276             | 150 152 158 166         | 102 129 131 134 136 152 154                     | 149 161 169 179 181 182 189 191 |
| Sachinoka               | 244 260 265 276 282 286         | 146 150 152 158 166     | 102 129 130 133 134 136 138 152 154             | 161 169 179 181 182 189         |
| Sagahonoka              | 244 260 265 268 276 286         | 146 150 152 158 162 166 | 102 118 122 129 133 134 136 150 152             | 149 161 169 181 189             |
| Sequoia                 | 260 262 265 268 284 294 302     | 146 150 164 169 175     | 102 114 118 131 133 136 138 142 144 146 154     | 161 179 181 182 183             |
| Summer-berry            | 244 262 265 276 282 302         | 134 146 150 152 175     | 102 114 125 131 133 134 136 152                 | 161 163 169 179 189             |
| Summer-candy            | 244 265 268 270 282 302         | 134 146 152 158 162     | 102 114 131 133 136 142 152                     | 149 161 169 179 181 182 189     |
| Summer-drop             | 244 256 282 302                 | 146 150 164 166 170     | 114 122 129 131 133 136 140 152 156             | 149 161 169 179 181 182 183 189 |
| Summer-fairy            | 244 256 260 262 265 276 302     | 134 146 158 162 166     | 102 114 129 131 133 134 136 152 154             | 149 169 181 182 189             |
| Summer-princess         | 244 256 260 262 265 268 270 302 | 150 152 158 164 166     | 102 118 129 131 133 136 140 152 156             | 149 155 169 181 189             |
| Summer-tiara            | 262 265 268 270 276 282 286     | 146 148 150 158 164 166 | 102 118 125 129 131 136 138 148 152             | 149 161 169 179 181 189         |
| Tioga                   | 244 260 262 265 268 276 280     | 146 150 152 158 170     | 102 118 130 133 136 140 142 152 156             | 149 169 179 182 183 187 189     |
| Tochihime               | 244 256 260 265 268 276 286     | 150 158 162 166         | 102 118 133 134 136 142 144 152 154             | 149 161 169 181 183 189         |
| Tochihitomi             | 260 262 265 276 282 286 302     | 146 150 152 158 166     | 102 114 125 131 133 134 136 152                 | 161 163 169 181 189             |
| Tochiotome              | 244 256 265 268 270 276 286     | 150 152 158 162 166     | 102 118 133 134 136 142 152                     | 149 161 169 181 182 189         |
| Toyonoka                | 244 256 260 265 268 286         | 146 150 152 162         | 102 118 133 134 136 152                         | 149 161 169 181 189             |
| Tsuburoman              | 244 256 262 265 268 272 276     | 146 150 152 164 166     | 98 102 122 131 133 136 138 146 152 154          | 158 161 169 181 187 189         |
| Uzushio                 | 244 256 260 265 270 302         | 146 150 152 166 175     | 102 118 122 133 134 136 150                     | 149 169 183 189                 |
| Yayoihime               | 256 260 265 270 276 284 286     | 146 150 158 162 166     | 102 118 133 136 140 152 156                     | 149 161 167 169 181 183 189     |
| <i>F. chiloensis</i>    | 255 262 268 273 276 278 282     | 138 143 150 158 162 164 | 102 104 106 110 112 125 136 138 140 152         | 145 181 185 197                 |
| <i>F. virginiana</i> #1 | 252 272 274 276 280 282         | 144 152 154 162 164 170 | 120 128 130 132 134 142 144 148 150 152         | 142 151 157 164 168             |
| <i>F. virginiana</i> #2 | 254 264 272 294                 | 150 152 158 162 169 185 | 98 114 126 132 136 139 140 146 148              | 161 162 166 171 183 185         |

<sup>a</sup> The values of SSR genotypes indicate the sizes of amplified fragments in base pairs (bp).
